# Supplementary material
Source: publisher site journal article supplement (https://www.kjim.org/upload/media/kjim-2019-240-suppl1.pdf)
Supplement: Supplementary file 1 [file kjim-2019-240-suppl1.pdf]

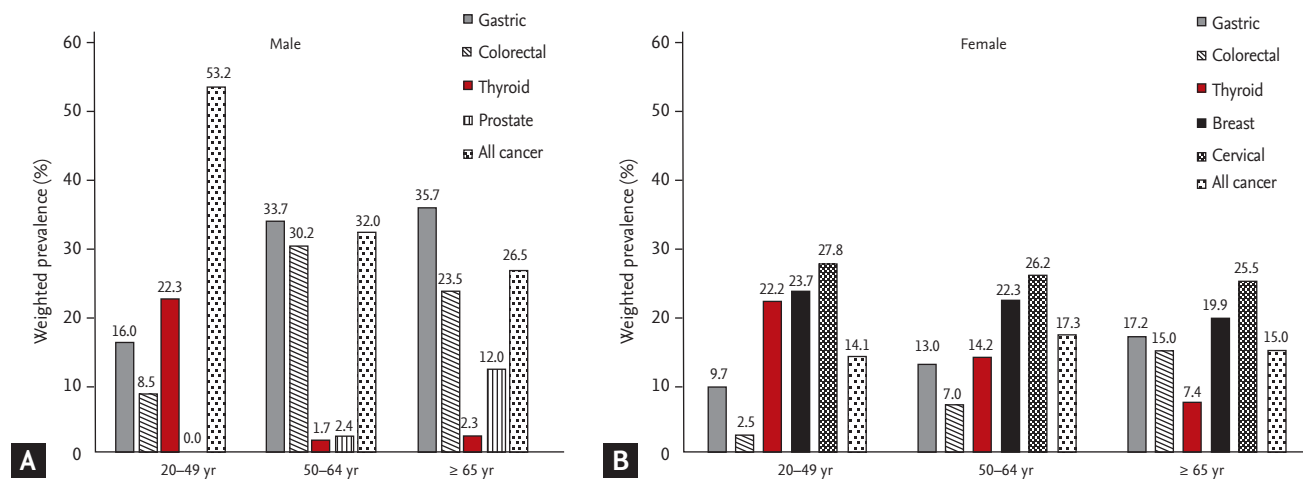

**Supplementary Figure 1.** Prevalence of cancer site according to age in male (A) and female (B). Values are indicated as weighted percentages.
